# Supplementary material
Source: PubMed Central journal article supplement (PMC5768452)
Supplement: NIHMS919101-supplement-supplement_1.pdf [file NIHMS919101-supplement-supplement_1.pdf]

### Supplemental Material

Supplemental Table 1. Sensitivity analyses using varying definitions of the outcome (1-5), specific exclusion criteria (6-12), and multiple imputation (13-16) from the fully adjusted model<sup>a</sup>

|                                                                                             | Psoriasis, Hazard Ratio (95%CI) |                   |                   |                  |
|---------------------------------------------------------------------------------------------|---------------------------------|-------------------|-------------------|------------------|
|                                                                                             | n                               | ≤2% BSA           | 3-10% BSA         | >10% BSA         |
| Varying definitions of T2DM <sup>b</sup> :                                                  |                                 |                   |                   |                  |
| (1) Two Diagnostic Codes                                                                    | 75421                           | 1.25 (1.05-1.48)  | 1.02 (0.81-1.27)  | 1.60 (1.19-2.15) |
| (2) One Diagnostic Code + One Diabetic Drug Code                                            | 75421                           | 1.32 (0.93-1.89)  | 1.208 (0.79-1.86) | 2.21 (1.31-3.70) |
| (3) One Diagnostic Code + One Laboratory Value                                              | 75421                           | 1.22 (1.00-1.48)  | 0.99 (0.77-1.27)  | 1.64 (1.19-2.26) |
| (4) One Diagnostic Code                                                                     | 75421                           | 1.18 (1.02-1.37)  | 0.98 (0.81-1.19)  | 1.53 (1.18-1.98) |
| (5) Any One of: Diagnostic Code, Diabetic Drug Code, or Laboratory Value                    | 75421                           | 1.14 (0.98-1.31)  | 1.06 (0.89-1.26)  | 1.61 (1.27-2.05) |
| Excluding patients:                                                                         |                                 |                   |                   |                  |
| (6) With any history of psoriatic arthritis                                                 | 74743                           | 1.22 (1.02-1.47)  | 0.94 (0.74-1.20)  | 1.42 (1.00-2.23) |
| (7) With any history of Systemic Corticosteroids                                            | 68243                           | 1.22 (1.01-1.48)  | 0.99 (0.78-1.26)  | 1.57 (1.15-2.16) |
| (8) With any history or use during observation period of Biologic, Systemic or Phototherapy | 74433                           | 1.19 (1.00-1.43)  | 0.99 (0.79-1.26)  | 1.42 (0.98-2.04) |
| (9) Registered within 9 months prior to index date                                          | 73084                           | 1.20 (1.01-1.44)  | 1.03 (0.83-1.29)  | 1.61 (1.20-2.15) |
| (10) With T2DM diagnosed within 1 year after index date                                     | 70456                           | 1.21 (1.01-1.44)  | 1.01 (0.81-1.26)  | 1.64 (1.23-2.18) |
| (11) With less than 1 GP visit per year, on average                                         | 73595                           | 1.20 (1.01-1.43)  | 1.01 (0.81-1.26)  | 1.63 (1.22-2.17) |
| (12) With any history or use during observation period of Biologic or Systemic therapies    | 74786                           | 1.19 (1.00-1.43)  | 1.00 (0.79-1.25)  | 1.47 (1.06-2.04) |
| BMI Missing Data Handling:                                                                  |                                 |                   |                   |                  |
| (13) Exclude missing BMI data                                                               | 75421                           | 1.21 (1.01-1.44)  | 1.01 (0.81-1.26)  | 1.64 (1.23-2.18) |
| (14) Multiple Imputation of missing BMI                                                     | 84723                           | 1.21 (1.018-1.44) | 1.10 (0.89-1.36)  | 1.67 (1.26-2.22) |
| (15) Missing BMI Data as separate category                                                  | 84723                           | 1.18 (1.00-1.41)  | 1.08 (0.87-1.33)  | 1.60 (1.20-2.12) |
| (16) BMI as a Continuous measure (vs. categorical)                                          | 75421                           | 1.21 (1.02-1.44)  | 1.00 (0.80-1.25)  | 1.65 (1.24-2.20) |

<sup>a</sup> Fully Adjusted Model was adjusted for age, sex, and body mass index.

<sup>b</sup> Type 2 Diabetes Mellitus defined by: (1) Two Diagnostic READ codes; (2) One Diagnostic READ code and 1 Diabetic Drug code; (3) One Diagnostic READ code and 1 Laboratory value of HbA1c ≥6.5% or ≥48mmol/mol.
